# Supplementary material
Source: PubMed Central journal article supplement (PMC5408576)
Supplement: NIHMS848272-supplement-Supplement1.pdf [file NIHMS848272-supplement-Supplement1.pdf]

## Supplementary Appendix

This appendix has been provided by the authors to give readers additional information about their work.

Supplement to: Regules JA, Beigel JH, Paolino KM, et al. A recombinant vesicular stomatitis virus Ebola vaccine. *N Engl J Med* 2017;376:330-41. DOI: 10.1056/NEJMoa1414216

# Supplemental Materials for

## A Recombinant Vesicular Stomatitis Virus Ebola Vaccine

\*#Jason A. Regules, M.D.<sup>1</sup>,\* John H. Beigel, M.D.<sup>2</sup>, Kristopher M. Paolino, M.D.<sup>1</sup>, Jocelyn Voell, RN<sup>3</sup>, MS, Amy R. Castellano, L.P.N.<sup>1</sup>, Zonghui Hu, Ph.D.<sup>3</sup>, Paula Muñoz, B.S.<sup>3</sup>, James E. Moon, M.D.<sup>1</sup>, Richard C. Ruck, M.D.<sup>1</sup>, Jason W. Bennett, M.D.<sup>1</sup>, Patrick S. Twomey, M.D.<sup>1</sup>, Ramiro L. Gutiérrez, M.D.<sup>7</sup>, Shon A. Remich, M.D.<sup>1</sup>, Holly R. Hack, M.S.<sup>1</sup>, Meagan L. Wisniewski, Ph.D.<sup>5</sup>, Matthew D. Josleyn, M.S.<sup>5</sup>, Steven A. Kwilas, Ph.D.<sup>5</sup>, Nicole Van Deusen, B.S.<sup>5</sup>, Olivier Tshiani Mbaya, M.D.<sup>4</sup>, Yan Zhou, Ph.D.<sup>4</sup>, Daphne A. Stanley, M.S.<sup>4</sup>, Jing Wang, M.S.<sup>2</sup>, Kirsten S. Smith, Ph.D.<sup>5</sup>, Meng Shi, M.A.<sup>1</sup>, Julie E. Ledgerwood, D.O.<sup>4</sup>, Barney S. Graham, M.D.<sup>4</sup>, Nancy J. Sullivan, Ph.D.<sup>4</sup>, Linda L. Jagodzinski, Ph.D.<sup>1</sup>, Sheila A. Peel, M.S.P.H., Ph.D.<sup>1</sup>, Judie B. Alimonti, Ph.D.<sup>8</sup>, Jay W. Hooper, Ph.D.<sup>5</sup>, Peter M. Silvera, Ph.D.<sup>5</sup>, Brian K. Martin, Ph.D.<sup>6</sup>, Thomas P. Monath, M.D.<sup>6</sup>, W. Jay Ramsey, M.D., Ph.D.<sup>6</sup>, Charles J. Link, M.D.<sup>6</sup>, H. Clifford Lane<sup>3</sup>, M.D., Nelson L. Michael, M.D., Ph.D.<sup>1</sup>, \*\*Richard T. Davey, Jr., M.D.<sup>3</sup>, \*\*Stephen J. Thomas, M.D.<sup>1</sup>, and the rVSVΔG-ZEBOV-GP Study Group.

\*Drs. Regules and Beigel contributed equally to this article

\*\*Drs. Davey and Thomas contributed equally to this article

### Affiliations:

<sup>1</sup> Walter Reed Army Institute of Research, Silver Spring, MD

<sup>2</sup> Leidos Biomedical Research Inc., Frederick National Laboratory for Cancer Research, Frederick, MD

<sup>3</sup> National Institute of Allergy and Infectious Diseases, Bethesda, MD

<sup>4</sup> Vaccine Research Center, National Institute of Allergy and Infectious Diseases, Bethesda, MD

<sup>5</sup> United States Army Medical Research Institute of Infectious Diseases, Frederick, MD

<sup>6</sup> BioProtection Systems/NewLink Genetics Corp., Ames, IA

<sup>7</sup> Naval Medical Research Center

<sup>8</sup> Public Health Agency of Canada

#Corresponding Author, [jason.a.regules.mil@mail.mil](mailto:jason.a.regules.mil@mail.mil), 301-619-6731, 1425 Porter Street, Frederick, MD 21702

## **Table of Contents**

|                                                                                              |    |
|----------------------------------------------------------------------------------------------|----|
| The rVSVΔG-ZEBOV-GP Study Group: .....                                                       | 3  |
| Methods: Statistical Analysis.....                                                           | 4  |
| Methods: rVSV-ZEBOV-GP surveillance via RT-PCR .....                                         | 4  |
| Methods: Measurement of antibody responses to Ebola Glycoprotein via ELISA .....             | 4  |
| Methods: Measurement of antibody responses to Ebola Glycoprotein via PsVNA.....              | 5  |
| Figure S1 – Screening, Enrollment, Vaccinations, and Follow-Up.....                          | 6  |
| Figure S2: Time to event for all solicited adverse events.....                               | 7  |
| Figure S3: Select Laboratory parameters .....                                                | 8  |
| Table S1: ELISA against the Zaire-Kikwit strain GP .....                                     | 9  |
| Table S2: Dose comparisons for ELISA against the Zaire-Kikwit strain GP .....                | 10 |
| Table S3: Day comparisons for ELISA against the Zaire-Kikwit strain GP .....                 | 11 |
| Table S4: Regimen comparisons ELISA against the Zaire-Kikwit strain GP .....                 | 11 |
| Table S5: Pseudovirion Neutralization Assay (PsVNA) against the Zaire-Kikwit strain GP ..... | 11 |
| Table S6: Dose Comparison for PsVNA against the Zaire-Kikwit strain GP .....                 | 14 |
| Table S7: Day Comparison for PsVNA against the Zaire-Kikwit strain GP .....                  | 14 |
| Table S8: Regimen Comparison for PsVNA against the Zaire-Kikwit strain GP .....              | 14 |
| Table S9: ELISA against the Zaire-Mayinga strain GP.....                                     | 15 |
| Table S10: Solicited, Unsolicited, and Laboratory Adverse Events .....                       | 16 |

**The rVSVΔG-ZEBOV-GP Study Group:**

Teresa A. Nowak,<sup>2</sup> Robin L. Bliss, PhD<sup>2</sup>, Deborah Cebrik, M.S., M.P.H.<sup>2</sup>, David M. Hone, Ph.D.<sup>3</sup>, Donald G. Heppner, M.D.<sup>3</sup>, L. Revell Phillips, Ph.D.<sup>3</sup>, Nicole R. Kilgore, M.S.<sup>4</sup>, Victor A. Suarez, M.S.<sup>4</sup>, Janice M. Rusnak, M.D.<sup>4</sup>, Christopher S. Badorrek, Ph.D.<sup>4</sup>, Kevin L. Wingerd, Ph.D.<sup>4</sup>, Susan B. Cicatelli, R.N.<sup>5</sup>, Jakub K. Simon, M.D., MS<sup>6</sup>, Ph.D., Beth-Ann G. Collier, Ph.D.<sup>6</sup>, Mark B. Feinberg, M.D., Ph.D.<sup>6</sup>

**Affiliations:**

<sup>1</sup> National Institute of Allergy and Infectious Diseases, Bethesda, MD

<sup>2</sup> Veristat, Holliston, MA

<sup>3</sup> Defense Threat Reduction Agency

<sup>4</sup> Medical Countermeasures Systems-Joint Vaccine Acquisition Program

<sup>5</sup> Walter Reed Army Institute of Research, Silver Spring, MD

<sup>6</sup> Merck

## **Methods: Statistical analysis**

Statistical analyses were performed utilizing R, version 3.3.1. For each serological parameter, summaries were by assessment day, and included calculation of the geometric mean titer (GMT), 95% confidence interval, median, minimum, and maximum values. Two-sample t-test was performed for comparisons in GMT between dose levels and study sites. Paired t-test was used for comparisons between time points within a dose level. All calculations and comparisons were performed on the log<sub>10</sub> scale. A positive response for the Kikwit-strain ELISA was defined as a titer  $\geq 50$ , with titers  $<50$  assigned values of 25 for calculation. A positive response for the PsVNA assay was defined as a titer of  $\geq 20$ , with titers  $<20$  assigned values of 10 for calculation. Seroconversion for these assays was defined as a four-fold increase in titer vs. baseline value. Baseline values were subtracted from the post-vaccination values for determination of the Mayinga strain ELISA titers, as previously described.<sup>1,2</sup>

## **Methods: rVSV-ZEBOV-GP surveillance via RT-PCR**

A reverse transcriptase – polymerase chain reaction (RT-PCR) assay to measure potential rVSV virus in the plasma, saliva, and urine, via amplification of the Ebola Zaire glycoprotein (GP) gene VSV insert, was performed at the WRAIR. Reagents for amplification of the Ebola Zaire glycoprotein (GP) gene VSV insert, human housekeeping gene, RNase P, and positive Ebola GP and RNase P controls were obtained from the Naval Medical Research Center (NMRC), United States Army Research Institute of Infectious Diseases (USAMRIID) Critical Reagent Program (CRP), Fort Detrick, MD. Total nucleic acid (NA) was purified from EDTA plasma (WRAIR and NIH), EDTA plasma stabilized in PrimeStore (NIH: 4 fold dilution), saliva swab stabilized in PrimeStore, and Urine (WRAIR and NIH: 1.5 ml, centrifuged at 25,000 xg for 60 min), using the QIAamp Viral RNA extraction kit on the QIAcube (Qiagen, Inc. Valencia, CA). All specimens were lysed prior to placement into the QIAcube and NAs were eluted in 50  $\mu$ l of diluent. Real-time RT-PCR amplification was performed immediately post NA purification following the Ebola Zaire (EZ1) rRT-PCR TaqMan Assay Instruction Booklet version 2 (8-14-2014), except for plate layout and sealing of reaction wells. Day 0 time point specimens were used as negative extraction controls in all assay runs. No Template Controls, NTC1 and NTC2, for both EZ1 and RNase P were employed to monitor contamination: NTC1s were added to reaction plates prior to RNA addition and sealed while NTC2s were added post RNA addition. Optical 8-well strip caps were used to seal reactions. Valid test run criteria required no nucleic acid detection in NTC1 and NTC2 wells and cycle threshold (Ct) values for both Ebola GP and RNase P RNA positive controls. Ct values for participant specimens subjected to EZ1 rRT assay were indicative of VSV viremia (plasma) or VSV in saliva or urine specimens. Specimens with no Ct value by EZ1 rRT-PCR assay, but with a Ct value by human RNase P rRT-PCR assay were scored as virus not detected.

## **Methods: Measurement of antibody responses to Ebola Glycoprotein via ELISA**

For the Zaire-Kikwit GP ELISA, serum samples were added to 96-well microtiter plates pre-coated with recombinant glycoprotein (GP) (Zaire-Kikwit). A reference standard and positive and negative controls were included. EBOV GP-specific antibodies were detected by the addition of an anti-human secondary immunoglobulin G (IgG) antibody conjugated to horse-radish peroxidase, followed by a colorimetric substrate, then optical density (OD) was read at an absorbance wavelength of 450nm. Endpoint titers

were calculated and expressed as the reciprocal of the highest serum dilution that yielded an OD reading greater than the cutoff OD of 0.2.

### **Methods: Measurement of antibody responses to Ebola Glycoprotein via PsVNA**

For the PsVNA, EBOV pseudovirions (PsV) were prepared using methods similar to those described previously.<sup>3,4</sup> The system employs a recombinant Vesicular Stomatitis Virus (rVSV) with the G protein gene deleted and a luciferase gene inserted as a reporter (VSVΔG\*rLuc).<sup>3</sup> EBOV PsV were produced using a plasmid expressing the EBOV Zaire 95 Kikwit GP, pWRG7077 EBOV<sub>co</sub>.<sup>5</sup> The PsVNA was performed as previously described.<sup>6</sup> Briefly, an initial 1:10 dilution (in triplicate) of heat-inactivated sera was made followed by five-fold serial dilutions that were mixed with an equal volume of complete EMEM containing EBOV PsV at approximately 4,000 focus-forming units (FFU) per well of a 96-well plate, and 10% (v/v) human complement (Sigma). This mixture, containing 5% human complement, 4,000 FFU of PsV, and sera at a final 1:20-1,562,500 dilution range, was incubated overnight at 4°C. Following this incubation, 50 µl of the PsV + antibody mixture were inoculated onto Vero cell monolayers in a clear bottom black-walled 96-well plate (Corning). Plates were incubated at 37°C for 18-24 hr. Overlying media was removed and the cells were lysed according to the luciferase kit protocol (Promega #E2820). A Tecan M200 Pro microplate reader was used to acquire flash luciferase data. The raw data (relative light units) were exported to GraphPad Prism version 6.04, where the data were baseline-corrected to the untreated PsV signal. The data were fit to a four-parameter logistic equation using GraphPad Prism and then PsVNA 50% (PsVNA<sub>50</sub>) neutralization titers were interpolated from the curves for each sample. The data are reported as the geometric mean titer for replicates.

### **References**

1. Ledgerwood JE, DeZure AD, Stanley DA, et al. Chimpanzee Adenovirus Vector Ebola Vaccine — Preliminary Report. *New England Journal of Medicine* 2014;141126135947008.
2. Ewer K, Rampling T, Venkatraman N, et al. A Monovalent Chimpanzee Adenovirus Ebola Vaccine Boosted with MVA. *New England Journal of Medicine* 2016;374(17):1635–46.
3. Ray N, Whidby J, Stewart S, Hooper JW, Bertolotti-Ciarlet A. Study of Andes virus entry and neutralization using a pseudovirion system. *J Virol Methods* 2010;163(2):416–23.
4. Ogino M, Ebihara H, Lee B-H, et al. Use of vesicular stomatitis virus pseudotypes bearing hantaan or seoul virus envelope proteins in a rapid and safe neutralization test. *Clin Diagn Lab Immunol* 2003;10(1):154–60.
5. Grant-Klein RJ, Van Deusen NM, Badger CV, Hannaman D, Dupuy LC, Schmaljohn CS. A multiagent filovirus DNA vaccine delivered by intramuscular electroporation completely protects mice from ebola and Marburg virus challenge. *Hum Vaccin Immunother* 2012;8(11):1703–6.
6. Kwilas S, Kishimori JM, Josleyn M, et al. A hantavirus pulmonary syndrome (HPS) DNA vaccine delivered using a spring-powered jet injector elicits a potent neutralizing antibody response in rabbits and nonhuman primates. *Curr Gene Ther* 2014;14(3):200–10.

**Figure S1 – Screening, Enrollment, Vaccinations, and Follow-Up.**

The WRAIR and NIAID study sites performed the studies independently. Cohorts 1, 2, and 3 were enrolled sequentially at each site. Four subjects in Cohort 2 were lost to follow-up during the course of the study.

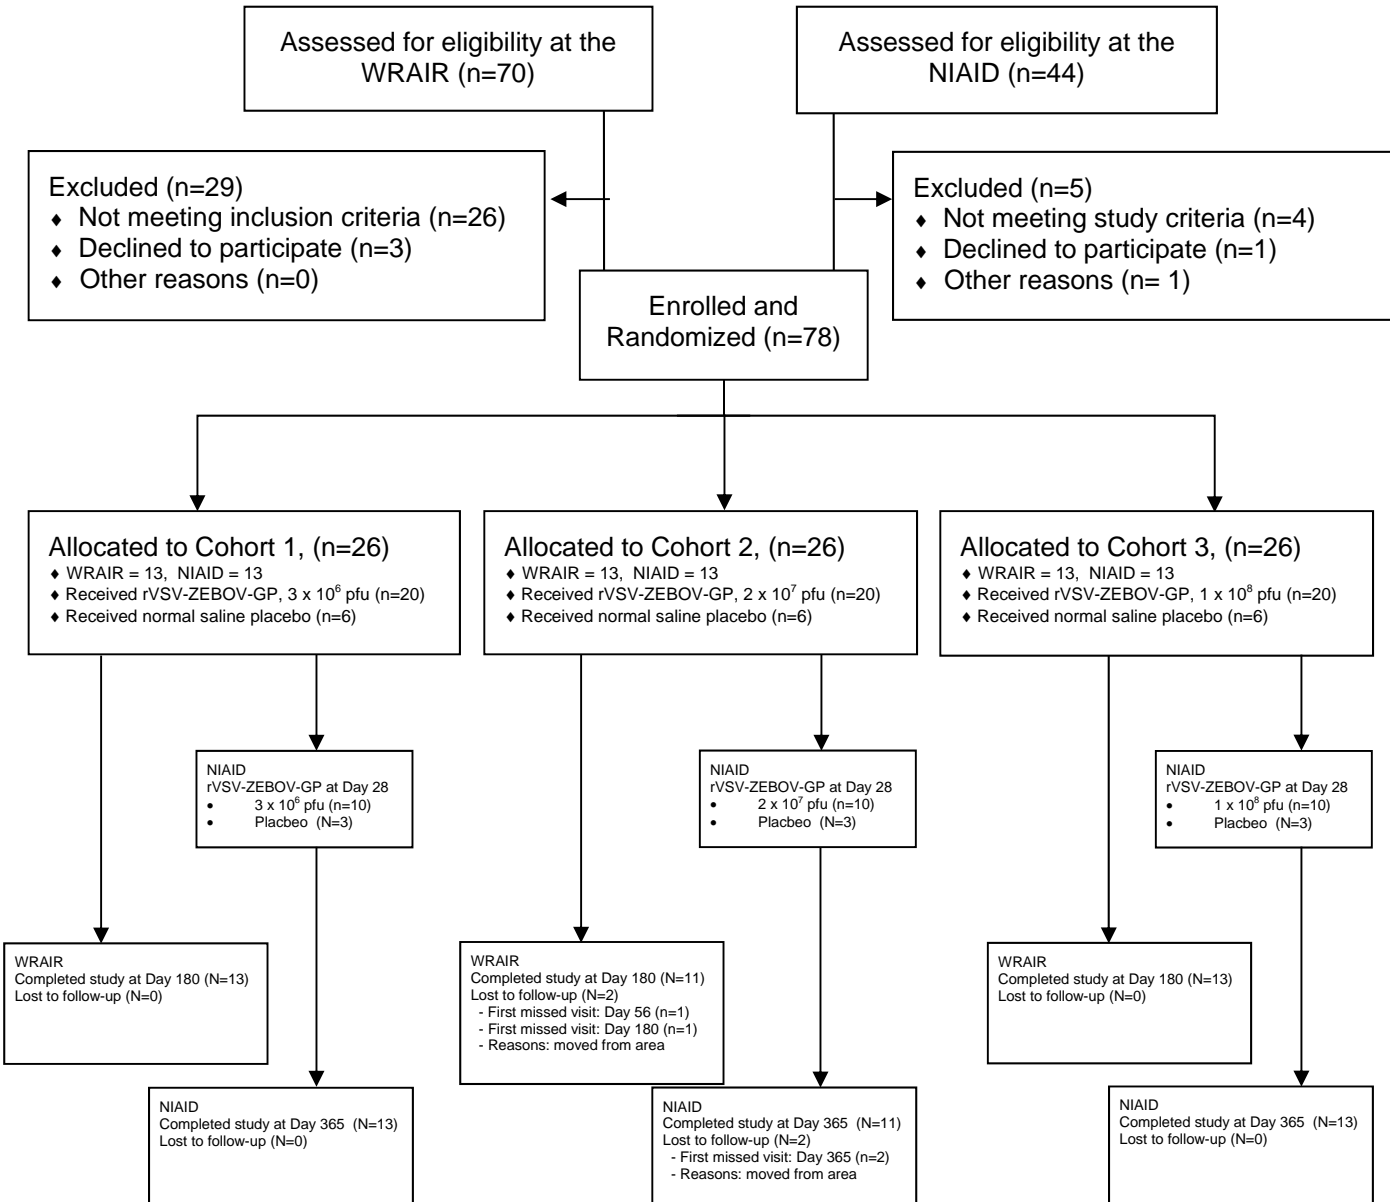

**Figure S2: Time to event for all solicited adverse events**

Plots depict day after vaccination (x-axis) and proportion of volunteers remaining without first occurrence of given symptom (y-axis).

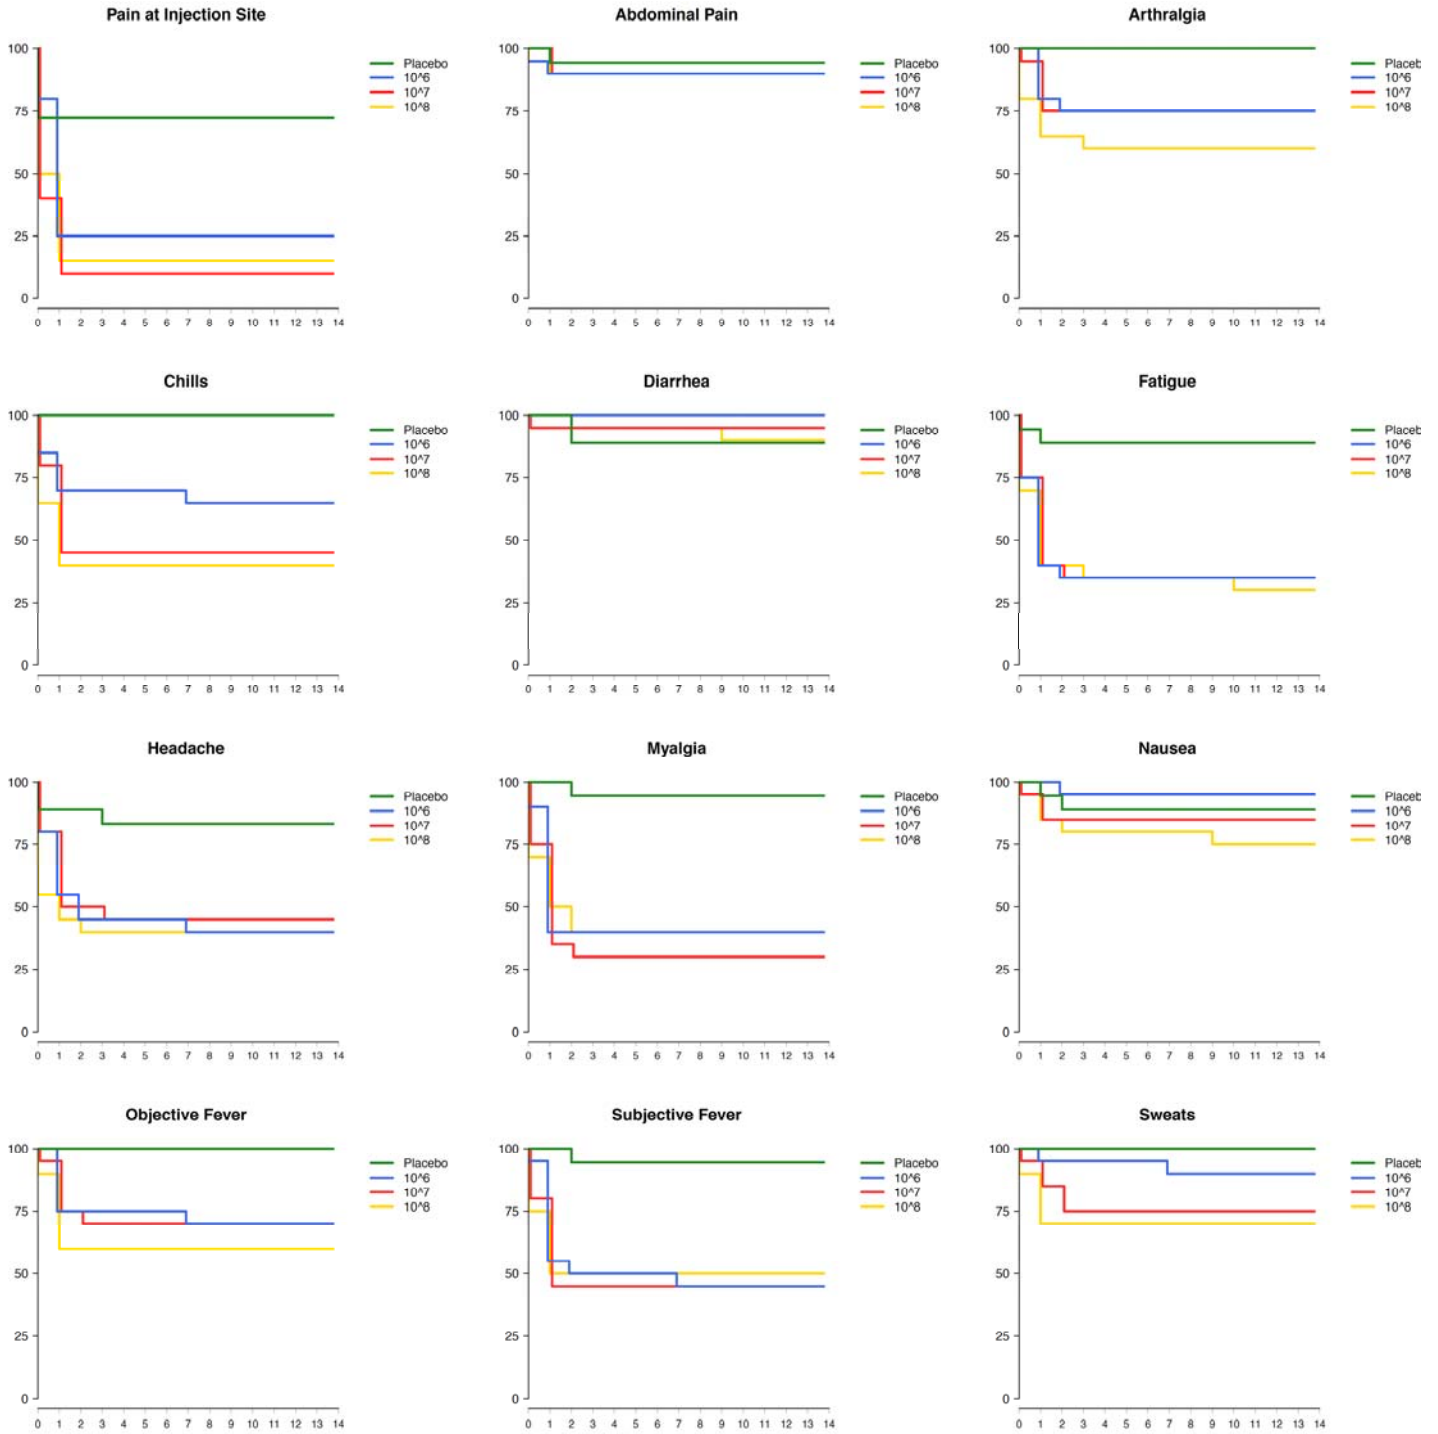



**Figure S3: Select Laboratory parameters**

Mean and 95% confidence interval by dose level for WBCs (panel A), neutrophils, (panel B), lymphocytes (panel C), and platelets (panel D) in SI units at Study Days 0 (Baseline), 1, 3, 7, and 28. Days 1 and 3 only collected at the WRAIR study site.

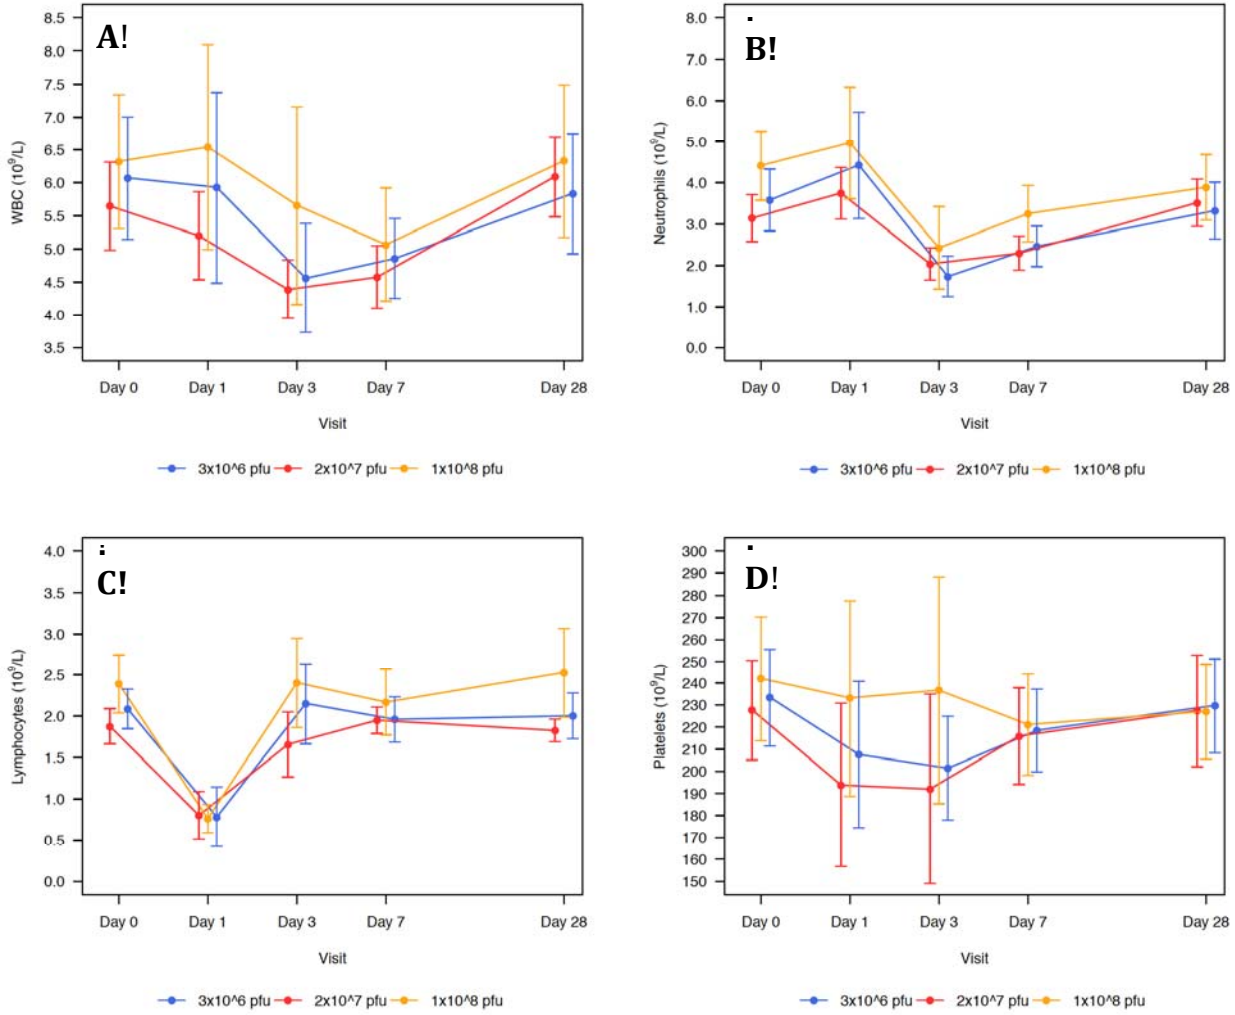

**Table S1: ELISA against the Zaire-Kikwit strain GP**

Antibody titers as assessed at Day 0, and 7, 14, and 28 days after vaccination, as measured by ELISA against the Zaire-Kikwit strain GP. For each parameter, summaries were performed by assessment day, and included calculation of the geometric mean titer (GMT), 95% confidence interval of the GMT, median, and minimum and maximum values. Not all samples have been tested at Day 7 due to laboratory capacity (WRAIR data presented on day 7) . Titers of <50 are given a value of 25, titers > 25600 are given a value of 25600 for calculation. \*Analysis of variance (ANOVA) models were performed for each parameter to compare observed GMT values between dose levels at Day 14 and Day 28. \*\*Additional comparisons were performed between Day 14 and Day 28 using paired t-tests by dose level.

| Vaccine Dose          | 2nd Dose?* |        | Day 0 | Day 7 | Day 14  | Day 28   | Day 56   | Day 84  | Day 180 |
|-----------------------|------------|--------|-------|-------|---------|----------|----------|---------|---------|
| Placebo*              | N/A        | N      | 18    | 9     | 18      | 18       | 18       | 18      | 17      |
|                       |            | GMT    | 28.06 | 34.02 | 29.16   | 29.16    | 30.31    | 27      | 30.65   |
|                       |            | lower  | 21.99 | 19.82 | 22.66   | 22.66    | 24.86    | 22.95   | 19.9    |
|                       |            | upper  | 35.81 | 58.39 | 37.53   | 37.53    | 36.95    | 31.77   | 47.22   |
|                       |            | median | 25    | 25    | 25      | 25       | 25       | 25      | 25      |
|                       |            | min    | 25    | 25    | 25      | 25       | 25       | 25      | 25      |
|                       |            | max    | 200   | 200   | 200     | 200      | 100      | 100     | 800     |
| 3x10 <sup>6</sup> pfu | Y          | N      | 10    | NA    | 10      | 10       | 10       | 10      | 9       |
|                       |            | GMT    | 25    | NA    | 200     | 1299.6   | 4222.43  | 2985.71 | 3200    |
|                       |            | lower  | 25    | NA    | 56.8    | 577.33   | 2477.85  | 1823.49 | 1878.27 |
|                       |            | upper  | 25    | NA    | 704.21  | 2925.49  | 7195.31  | 4888.68 | 5451.83 |
|                       |            | median | 25    | NA    | 200     | 1600     | 6400     | 3200    | 3200    |
|                       |            | min    | 25    | NA    | 25      | 200      | 800      | 800     | 800     |
|                       |            | max    | 25    | NA    | 12800   | 12800    | 6400     | 6400    | 6400    |
|                       | N          | N      | 10    | 10    | 10      | 10       | 10       | 10      | 10      |
|                       |            | GMT    | 25    | 25    | 400     | 1299.6   | 2599.21  | 2262.74 | 2785.76 |
|                       |            | lower  | 25    | 25    | 237.17  | 731.34   | 1537.15  | 1484.66 | 1248.05 |
|                       |            | upper  | 25    | 25    | 674.61  | 2309.42  | 4395.07  | 3448.59 | 6218.08 |
|                       |            | median | 25    | 25    | 400     | 1200     | 3200     | 2400    | 2400    |
|                       |            | min    | 25    | 25    | 200     | 400      | 800      | 800     | 400     |
|                       |            | max    | 25    | 25    | 1600    | 6400     | 12800    | 6400    | 25600   |
| 2x10 <sup>7</sup> pfu | Y          | N      | 10    | NA    | 10      | 10       | 10       | 10      | 10      |
|                       |            | GMT    | 28.72 | NA    | 1131.37 | 5198.42  | 7351.67  | 4222.43 | 3675.83 |
|                       |            | lower  | 23.3  | NA    | 662.23  | 2477.73  | 4971.88  | 3268.58 | 2485.94 |
|                       |            | upper  | 35.4  | NA    | 1932.87 | 10906.57 | 10870.55 | 5454.63 | 5435.28 |
|                       |            | median | 25    | NA    | 800     | 3200     | 6400     | 3200    | 3200    |
|                       |            | min    | 25    | NA    | 400     | 1600     | 3200     | 3200    | 1600    |
|                       |            | max    | 50    | NA    | 3200    | 25600    | 12800    | 6400    | 12800   |
|                       | N          | N      | 10    | 10    | 10      | 10       | 10       | 10      | 9       |

|                       |   |        |       |       |         |         |          |          |         |
|-----------------------|---|--------|-------|-------|---------|---------|----------|----------|---------|
|                       |   | GMT    | 25    | 25    | 649.8   | 3200    | 3732.89  | 2743.18  | 2539.84 |
|                       |   | lower  | 25    | 25    | 234.27  | 1724.13 | 2085.24  | 1634.49  | 1195.55 |
|                       |   | upper  | 25    | 25    | 1802.41 | 5939.24 | 6682.45  | 4603.91  | 5395.66 |
|                       |   | median | 25    | 25    | 800     | 2400    | 6400     | 3200     | 1600    |
|                       |   | min    | 25    | 25    | 50      | 1600    | 800      | 800      | 800     |
|                       |   | max    | 25    | 25    | 12800   | 12800   | 6400     | 6400     | 12800   |
| 1x10 <sup>8</sup> pfu | Y | N      | 10    | NA    | 10      | 10      | 10       | 10       | 10      |
|                       |   | GMT    | 28.72 | NA    | 649.8   | 3675.83 | 11143.05 | 7351.67  | 5571.52 |
|                       |   | lower  | 20.99 | NA    | 298.77  | 2330.6  | 8143.45  | 4971.88  | 3338.63 |
|                       |   | upper  | 39.3  | NA    | 1413.28 | 5797.53 | 15247.53 | 10870.55 | 9297.8  |
|                       |   | median | 25    | NA    | 800     | 3200    | 12800    | 6400     | 4800    |
|                       |   | min    | 25    | NA    | 50      | 1600    | 6400     | 3200     | 3200    |
|                       |   | max    | 100   | NA    | 1600    | 12800   | 25600    | 25600    | 25600   |
|                       | N | N      | 10    | 10    | 10      | 10      | 10       | 10       | 10      |
|                       |   | GMT    | 28.72 | 30.78 | 1212.57 | 4525.48 | 4525.48  | 3939.66  | 2785.76 |
|                       |   | lower  | 23.3  | 24.22 | 342.89  | 2141.22 | 1932.63  | 1500.69  | 1169.06 |
|                       |   | upper  | 35.4  | 39.11 | 4288.05 | 9564.64 | 10596.97 | 10342.54 | 6638.23 |
|                       |   | median | 25    | 25    | 2000    | 4800    | 4800     | 6400     | 3200    |
|                       |   | min    | 25    | 25    | 50      | 800     | 400      | 200      | 200     |
|                       |   | max    | 50    | 50    | 6400    | 12800   | 25600    | 25600    | 12800   |

**Table S2: Dose comparisons for ELISA against the Zaire-Kikwit strain GP**

Analysis comparing the ELISA response at different vaccine doses, by study day and by those subjects that received a second dose or not. All p values based on two-sample t-test.

| Day | 2 <sup>nd</sup> Dose? | 10 <sup>6</sup> vs 10 <sup>7</sup> | 10 <sup>6</sup> vs 10 <sup>8</sup> | 10 <sup>7</sup> vs 10 <sup>8</sup> |
|-----|-----------------------|------------------------------------|------------------------------------|------------------------------------|
|     |                       | p-value                            | p-value                            | p-value                            |
| 14  | N/A                   | 0.008                              | 0.015                              | 0.934                              |
| 28  | N/A                   | 0.001                              | <0.001                             | 1                                  |
| 56  | Yes                   | 0.075                              | 0.003                              | 0.078                              |
|     | No                    | 0.306                              | 0.229                              | 0.677                              |
| 84  | Yes                   | 0.181                              | 0.005                              | 0.017                              |
|     | No                    | 0.519                              | 0.256                              | 0.466                              |
| 180 | Yes                   | 0.638                              | 0.105                              | 0.163                              |
|     | No                    | 0.85                               | 1                                  | 0.857                              |

**Table S3: Day comparisons for ELISA against the Zaire-Kikwit strain GP**

Analysis comparing the ELISA response at different study days, by vaccine doses and by those subjects that received a second dose or not. All p values based on two-sample t-test.

| Dose                  | 2 <sup>nd</sup> Dose? | Day 28 vs. 56 | Day 28 vs. 84 |
|-----------------------|-----------------------|---------------|---------------|
|                       |                       | p-value       | p-value       |
| 3x10 <sup>6</sup> pfu | Yes                   | <0.001        | 0.018         |
|                       | No                    | <0.001        | 0.003         |
| 2x10 <sup>7</sup> pfu | Yes                   | 0.272         | 0.520         |
|                       | No                    | 0.799         | 0.499         |
| 1x10 <sup>8</sup> pfu | Yes                   | <0.001        | 0.023         |
|                       | No                    | 1             | 0.726         |

**Table S4: Regimen comparisons ELISA against the Zaire-Kikwit strain GP**

Analysis comparing the ELISA response of those subjects that received 2 vaccinations vs 1 vaccination, by vaccine dose and study day. All p values based on two-sample t-test.

| Dose                  | Day | 2 vaccinations vs 1 vaccination |
|-----------------------|-----|---------------------------------|
|                       |     | p-value                         |
| 3x10 <sup>6</sup> pfu | 28  | 1                               |
|                       | 56  | 0.16                            |
|                       | 180 | 0.748                           |
| 2x10 <sup>7</sup> pfu | 28  | 0.271                           |
|                       | 56  | 0.043                           |
|                       | 180 | 0.337                           |
| 1x10 <sup>8</sup> pfu | 28  | 0.599                           |
|                       | 56  | 0.045                           |
|                       | 180 | 0.141                           |

**Table S5: Pseudovirion Neutralization Assay (PsVNA) against the Zaire-Kikwit strain GP**

Antibody titers as assessed at Day 0, and 7, 14, and 28 days after vaccination, as measured by the PsVNA. For each parameter, summaries were performed by assessment day, and included calculation of the geometric mean titer (GMT), 95% confidence interval of the GMT, median, and minimum and maximum values. Not all samples have been tested at Day 7 and 14 due to laboratory capacity (WRAIR data presented where n<20). For the day 14 Titers of <20 are given a value of 10 for calculation.

\*Analysis of variance (ANOVA) models were performed for each parameter to compare observed GMT values between dose levels at Day 14 and Day 28. \*\*Additional comparisons were performed between Day 14 and Day 28 using paired t-tests by dose level.

| Vaccine Dose | 2 <sup>nd</sup> Dose* |       | Day 0 | Day 7 | Day 14 | Day 28 | Day 56 | Day 84 | Day 180 |
|--------------|-----------------------|-------|-------|-------|--------|--------|--------|--------|---------|
| Placebo      | N/A                   | N     | 18    | 9     | 18     | 18     | 18     | 9      | 18      |
|              |                       | GMT   | 10    | 10    | 10     | 10     | 10     | 10     | 10      |
|              |                       | lower | 10    | 10    | 10     | 10     | 10     | 10     | 10      |
|              |                       | upper | 10    | 10    | 10     | 10     | 10     | 10     | 10      |

|                       |     |        |    |     |        |         |        |        |        |
|-----------------------|-----|--------|----|-----|--------|---------|--------|--------|--------|
|                       |     | median | 10 | 10  | 10     | 10      | 10     | 10     | 10     |
|                       |     | min    | 10 | 10  | 10     | 10      | 10     | 10     | 10     |
|                       |     | max    | 10 | 10  | 10     | 10      | 10     | 10     | 10     |
| 3x10 <sup>6</sup> pfu | Y   | N      | 10 | NA  | 10     | 10      | 10     | 10     | 9      |
|                       |     | GMT    | 10 | NA  | 32.46  | 222.23  | 344.13 | 32.65  | 36.09  |
|                       |     | lower  | 10 | NA  | 15.8   | 139.65  | 203.11 | 15.39  | 16.17  |
|                       |     | upper  | 10 | NA  | 66.7   | 353.66  | 583.05 | 69.26  | 80.55  |
|                       |     | median | 10 | NA  | 36.5   | 239.5   | 346.5  | 32.5   | 60     |
|                       |     | min    | 10 | NA  | 10     | 94      | 125    | 10     | 10     |
|                       |     | max    | 10 | NA  | 143    | 519     | 999    | 223    | 118    |
|                       | N   | N      | 10 | 10  | 10     | 10      | 10     | NA     | 10     |
|                       |     | GMT    | 10 | 10  | 45.97  | 222.81  | 137.72 | NA     | 26.19  |
|                       |     | lower  | 10 | 10  | 21.86  | 96.96   | 74.14  | NA     | 9.61   |
|                       |     | upper  | 10 | 10  | 96.65  | 512.03  | 255.82 | NA     | 71.38  |
|                       |     | median | 10 | 10  | 45     | 207     | 141.5  | NA     | 10     |
|                       |     | min    | 10 | 10  | 10     | 30      | 44     | NA     | 10     |
|                       |     | max    | 10 | 10  | 282    | 2461    | 462    | NA     | 538    |
| 2x10 <sup>7</sup> pfu | Y   | N      | 10 | NA  | 10     | 10      | 10     | 10     | 10     |
|                       |     | GMT    | 10 | NA  | 10     | 415.85  | 653    | 47.31  | 34.85  |
|                       |     | lower  | 10 | NA  | 10     | 156.16  | 468.14 | 27.64  | 17.36  |
|                       |     | upper  | 10 | NA  | 10     | 1107.38 | 910.85 | 80.96  | 69.99  |
|                       |     | median | 10 | NA  | 10     | 293     | 615    | 49     | 42     |
|                       |     | min    | 10 | NA  | 10     | 56      | 242    | 10     | 10     |
|                       |     | max    | 10 | NA  | 10     | 2396    | 1474   | 134    | 148    |
|                       | N   | N      | 10 | 10  | 10     | 10      | 10     | NA     | 10     |
|                       |     | GMT    | 10 | 10  | 216.51 | 468.03  | 170.34 | NA     | 22.95  |
|                       |     | lower  | 10 | 10  | 92.35  | 174.75  | 105.59 | NA     | 10.13  |
|                       |     | upper  | 10 | 10  | 507.59 | 1253.55 | 274.81 | NA     | 52.02  |
|                       |     | median | 10 | 10  | 242.5  | 377     | 135    | NA     | 10     |
|                       |     | min    | 10 | 10  | 10     | 83      | 70     | NA     | 10     |
|                       |     | max    | 10 | 10  | 635    | 4910    | 434    | NA     | 130    |
| 1x10 <sup>8</sup> pfu | Y   | N      | 10 | NA  | 10     | 10      | 10     | 10     | 10     |
|                       |     | GMT    | 10 | NA  | 91.53  | 475.54  | 669.02 | 89.71  | 46.8   |
|                       |     | lower  | 10 | NA  | 34.75  | 239.56  | 418.04 | 46.59  | 15.57  |
|                       |     | upper  | 10 | NA  | 241.08 | 943.98  | 1070.7 | 172.73 | 140.71 |
|                       |     | median | 10 | NA  | 66.5   | 461.5   | 661.5  | 99.5   | 52.5   |
|                       |     | min    | 10 | NA  | 10     | 88      | 252    | 21     | 10     |
|                       | max | 10     | NA | 777 | 2075   | 1644    | 341    | 832    |        |
|                       | N   | N      | 10 | 10  | 10     | 10      | 10     | NA     | 10     |
|                       |     | GMT    | 10 | 10  | 175.9  | 446.96  | 218.63 | NA     | 46.23  |
|                       |     | lower  | 10 | 10  | 64.79  | 262.88  | 98.29  | NA     | 20.79  |
| upper                 |     | 10     | 10 | 10  | 10     | 10      | 10     | 10     |        |

|  |  |        |    |    |       |        |        |    |       |
|--|--|--------|----|----|-------|--------|--------|----|-------|
|  |  | upper  | 10 | 10 | 477.6 | 759.95 | 486.31 | NA | 102.8 |
|  |  | median | 10 | 10 | 127.5 | 562.5  | 188    | NA | 68.5  |
|  |  | min    | 10 | 10 | 10    | 138    | 22     | NA | 10    |
|  |  | max    | 10 | 10 | 1334  | 908    | 1636   | NA | 224   |

**Table S6: Dose Comparison for PsVNA against the Zaire-Kikwit strain GP**

Analysis comparing the PsVNA response at different vaccine doses, by study day and by those subjects that received a second dose or not. All p values based on two-sample t-test

| Day | 2 <sup>nd</sup> Dose?* | 10 <sup>6</sup> vs 10 <sup>7</sup> | 10 <sup>6</sup> vs 10 <sup>8</sup> | 10 <sup>7</sup> vs 10 <sup>8</sup> |
|-----|------------------------|------------------------------------|------------------------------------|------------------------------------|
|     |                        | p-value                            | p-value                            | p-value                            |
| 14  | N/A                    | 0.687                              | 0.004                              | 0.054                              |
| 28  | N/A                    | 0.068                              | 0.012                              | 0.901                              |
| 56  | Y                      | 0.034                              | 0.048                              | 0.925                              |
|     | N                      | 0.544                              | 0.316                              | 0.552                              |
| 84  | Y                      | 0.377                              | 0.034                              | 0.105                              |
|     | N**                    | N/A                                | N/A                                | N/A                                |
| 180 | Y                      | 0.941                              | 0.67                               | 0.616                              |
|     | N                      | 0.819                              | 0.33                               | 0.18                               |

**Table S7: Day Comparison for PsVNA against the Zaire-Kikwit strain GP**

Analysis comparing the PsVNA response at different study days, by vaccine doses and by those subjects that received a second dose or not. All p values based on two-sample t-test. N/T represents samples not tested.

| Dose                  | 2 <sup>nd</sup> Dose? | Day 28 vs. 56 | Day 28 vs. 84 |
|-----------------------|-----------------------|---------------|---------------|
|                       |                       | p-value       | p-value       |
| 3x10 <sup>6</sup> pfu | Yes                   | 0.082         | <0.001        |
|                       | No                    | 0.059         | N/A           |
| 2x10 <sup>7</sup> pfu | Yes                   | 0.326         | 0.003         |
|                       | No                    | 0.008         | N/A           |
| 1x10 <sup>8</sup> pfu | Yes                   | 0.187         | <0.001        |
|                       | No                    | 0.017         | N/A           |

**Table S8: Regimen Comparison for PsVNA against the Zaire-Kikwit strain GP**

Analysis comparing the PsVNA response of those subjects that received 2 vaccinations vs 1 vaccination, by vaccine dose and study day. All p values based on two-sample t-test.

| Dose                  | Day | 2 vaccinations vs 1 vaccination |
|-----------------------|-----|---------------------------------|
| 3x10 <sup>6</sup> pfu | 28  | 0.995                           |
|                       | 56  | 0.02                            |
|                       | 180 | 0.577                           |
| 2x10 <sup>7</sup> pfu | 28  | 0.85                            |
|                       | 56  | <0.001                          |
|                       | 180 | 0.387                           |
| 1x10 <sup>8</sup> pfu | 28  | 0.873                           |
|                       | 56  | 0.016                           |

|  |     |       |
|--|-----|-------|
|  | 180 | 0.984 |
|--|-----|-------|

**Table S9: ELISA against the Zaire-Mayinga strain GP**

Antibody titers as assessed at Day 0, and 28 days after vaccination, as measured by ELISA against the Zaire- Mayinga strain GP. For each parameter, summaries were performed by assessment day, and included calculation of the baseline-subtracted geometric mean titer (GMT), 95% confidence interval of the GMT, median, and minimum and maximum values. \*Analysis of variance (ANOVA) models were performed for each parameter to compare observed GMT values between dose levels at Day 28.

| Dose Level                               | Statistic | Day 0        | Day 28          | Change from Day 0 |
|------------------------------------------|-----------|--------------|-----------------|-------------------|
| Placebo                                  | N         | 11           | 11              | 11                |
|                                          | GMT       | 86.35        | 93.46           | 4.03              |
|                                          | 95% CI    | 51.18-145.69 | 62.38-140.02    | 1.57-10.37        |
|                                          | Median    | 114.00       | 92.00           | 4.00              |
|                                          | Min-Max   | 21.00-259.00 | 31.00-245.00    | 1.00-21.00        |
| 3x10 <sup>6</sup> pfu                    | N         | 20           | 20              | 20                |
|                                          | GMT       | 108.03       | 707.35          | 282.52            |
|                                          | 95% CI    | 54.83-212.82 | 414.62-1206.78  | 95.99-831.51      |
|                                          | Median    | 95.95        | 555.63          | 380.50            |
|                                          | Min-Max   | 6.00-3097.00 | 148.00-12910.00 | 1.00-12351.00     |
| 2x10 <sup>7</sup> pfu                    | N         | 20           | 20              | 20                |
|                                          | GMT       | 117.96       | 1697.63         | 1428.89           |
|                                          | 95% CI    | 78.78-176.62 | 1007.42-2860.73 | 808.18-2526.32    |
|                                          | Median    | 98.95        | 1469.91         | 1025.36           |
|                                          | Min-Max   | 25.00-950.00 | 414.00-17769.00 | 271.00-17581.00   |
| Comparison                               | Subset    | p value      |                 |                   |
| 2x10 <sup>7</sup> vs 3x10 <sup>6</sup> * | Day 28    | 0.0084       |                 |                   |



**Table S10: Number of Subjects with Solicited, Unsolicited, and Laboratory Adverse Events**

All adverse events graded for relatedness and severity based upon the FDA’s Guidance “Toxicity Grading Scale for Healthy Adult and Adolescent Volunteers Enrolled in Preventive Vaccine Clinical Trials”. AEs judged not related are not presented. Cohort 1= 3 x 10<sup>6</sup> pfu dose group, Cohort 2= 2 x 10<sup>7</sup> pfu dose group, and Cohort 3= 1 x 10<sup>8</sup> pfu dose.

| All Subjects - NIH and WRAIR combined           |                                                 | Adverse Events After First Vaccination (Study days 0-28) |   |          |          |          |          |          |   |          |         |   |          |                                                            |   |          |   |   |          |   |   |          |   |   |   |                                                |  |  |  |  |  |  |  |  |  |  |  |
|-------------------------------------------------|-------------------------------------------------|----------------------------------------------------------|---|----------|----------|----------|----------|----------|---|----------|---------|---|----------|------------------------------------------------------------|---|----------|---|---|----------|---|---|----------|---|---|---|------------------------------------------------|--|--|--|--|--|--|--|--|--|--|--|
|                                                 |                                                 | Cohort 1                                                 |   |          | Cohort 2 |          |          | Cohort 3 |   |          | Placebo |   |          |                                                            |   |          |   |   |          |   |   |          |   |   |   |                                                |  |  |  |  |  |  |  |  |  |  |  |
|                                                 |                                                 | Severity                                                 | 1 | 2        | 3        | Severity | 1        | 2        | 3 | Severity | 1       | 2 | 3        | Severity                                                   | 1 | 2        | 3 |   |          |   |   |          |   |   |   |                                                |  |  |  |  |  |  |  |  |  |  |  |
| Solicited AE                                    | Abdominal pain                                  | 2                                                        | 0 | 0        | 1        | 1        | 0        | 1        | 1 | 0        | 1       | 0 | 0        | 1                                                          | 0 | 0        | 0 |   |          |   |   |          |   |   |   |                                                |  |  |  |  |  |  |  |  |  |  |  |
|                                                 | Arthralgia                                      | 3                                                        | 2 | 0        | 2        | 3        | 0        | 3        | 4 | 1        | 0       | 0 | 0        | 0                                                          | 0 | 0        | 0 |   |          |   |   |          |   |   |   |                                                |  |  |  |  |  |  |  |  |  |  |  |
|                                                 | Chills                                          | 3                                                        | 3 | 1        | 6        | 3        | 2        | 5        | 5 | 2        | 0       | 0 | 0        | 0                                                          | 0 | 0        | 0 |   |          |   |   |          |   |   |   |                                                |  |  |  |  |  |  |  |  |  |  |  |
|                                                 | Diarrhea                                        | 0                                                        | 0 | 0        | 1        | 0        | 0        | 1        | 1 | 0        | 1       | 1 | 0        | 0                                                          | 0 | 0        | 0 |   |          |   |   |          |   |   |   |                                                |  |  |  |  |  |  |  |  |  |  |  |
|                                                 | Fatigue                                         | 10                                                       | 2 | 1        | 6        | 6        | 1        | 7        | 4 | 3        | 2       | 0 | 0        | 0                                                          | 0 | 0        | 0 |   |          |   |   |          |   |   |   |                                                |  |  |  |  |  |  |  |  |  |  |  |
|                                                 | Headache                                        | 7                                                        | 4 | 1        | 7        | 3        | 1        | 7        | 3 | 2        | 3       | 0 | 0        | 0                                                          | 0 | 0        | 0 |   |          |   |   |          |   |   |   |                                                |  |  |  |  |  |  |  |  |  |  |  |
|                                                 | Injection-Site Pain                             | 12                                                       | 3 | 0        | 15       | 3        | 0        | 15       | 4 | 0        | 3       | 0 | 0        | 0                                                          | 0 | 0        | 0 |   |          |   |   |          |   |   |   |                                                |  |  |  |  |  |  |  |  |  |  |  |
|                                                 | Injection-Site Redness                          | 0                                                        | 0 | 0        | 0        | 0        | 0        | 1        | 0 | 0        | 0       | 0 | 0        | 0                                                          | 0 | 0        | 0 |   |          |   |   |          |   |   |   |                                                |  |  |  |  |  |  |  |  |  |  |  |
|                                                 | Injection-Site Swelling                         | 1                                                        | 0 | 0        | 0        | 0        | 0        | 1        | 0 | 0        | 0       | 0 | 0        | 0                                                          | 0 | 0        | 0 |   |          |   |   |          |   |   |   |                                                |  |  |  |  |  |  |  |  |  |  |  |
|                                                 | Myalgia                                         | 10                                                       | 3 | 0        | 9        | 4        | 1        | 7        | 4 | 1        | 1       | 0 | 0        | 0                                                          | 0 | 0        | 0 |   |          |   |   |          |   |   |   |                                                |  |  |  |  |  |  |  |  |  |  |  |
|                                                 | Nausea                                          | 0                                                        | 1 | 0        | 2        | 1        | 0        | 3        | 2 | 0        | 2       | 0 | 0        | 0                                                          | 0 | 0        | 0 |   |          |   |   |          |   |   |   |                                                |  |  |  |  |  |  |  |  |  |  |  |
|                                                 | Objective Fever                                 | 4                                                        | 2 | 0        | 4        | 2        | 0        | 3        | 3 | 2        | 0       | 0 | 0        | 0                                                          | 0 | 0        | 0 |   |          |   |   |          |   |   |   |                                                |  |  |  |  |  |  |  |  |  |  |  |
|                                                 | Subjective Fever                                | 5                                                        | 4 | 2        | 6        | 4        | 1        | 5        | 3 | 2        | 1       | 0 | 0        | 0                                                          | 0 | 0        | 0 |   |          |   |   |          |   |   |   |                                                |  |  |  |  |  |  |  |  |  |  |  |
|                                                 | Sweats                                          | 2                                                        | 0 | 0        | 5        | 0        | 0        | 2        | 2 | 2        | 0       | 0 | 0        | 0                                                          | 0 | 0        | 0 |   |          |   |   |          |   |   |   |                                                |  |  |  |  |  |  |  |  |  |  |  |
|                                                 | Vomiting                                        | 0                                                        | 0 | 0        | 0        | 0        | 0        | 1        | 0 | 0        | 0       | 0 | 0        | 0                                                          | 0 | 0        | 0 |   |          |   |   |          |   |   |   |                                                |  |  |  |  |  |  |  |  |  |  |  |
| Unsolicited AE                                  | Anaemia                                         | 0                                                        | 0 | 0        | 0        | 0        | 0        | 0        | 1 | 0        | 0       | 0 | 0        | 0                                                          | 0 | 0        | 0 |   |          |   |   |          |   |   |   |                                                |  |  |  |  |  |  |  |  |  |  |  |
|                                                 | Chest discomfort                                | 0                                                        | 0 | 0        | 1        | 0        | 0        | 0        | 0 | 0        | 0       | 0 | 0        | 0                                                          | 0 | 0        | 0 |   |          |   |   |          |   |   |   |                                                |  |  |  |  |  |  |  |  |  |  |  |
|                                                 | Conjunctivitis                                  | 0                                                        | 0 | 0        | 1        | 0        | 0        | 0        | 0 | 0        | 0       | 0 | 0        | 0                                                          | 0 | 0        | 0 |   |          |   |   |          |   |   |   |                                                |  |  |  |  |  |  |  |  |  |  |  |
|                                                 | Dizziness postural                              | 0                                                        | 0 | 0        | 0        | 0        | 0        | 1        | 0 | 0        | 0       | 0 | 0        | 0                                                          | 0 | 0        | 0 |   |          |   |   |          |   |   |   |                                                |  |  |  |  |  |  |  |  |  |  |  |
|                                                 | Injection site bruising                         | 1                                                        | 0 | 0        | 0        | 0        | 0        | 0        | 0 | 0        | 0       | 0 | 0        | 0                                                          | 0 | 0        | 0 |   |          |   |   |          |   |   |   |                                                |  |  |  |  |  |  |  |  |  |  |  |
|                                                 | Injection site pruritus                         | 0                                                        | 0 | 0        | 1        | 0        | 0        | 0        | 0 | 0        | 0       | 0 | 0        | 0                                                          | 0 | 0        | 0 |   |          |   |   |          |   |   |   |                                                |  |  |  |  |  |  |  |  |  |  |  |
|                                                 | Mouth ulceration                                | 0                                                        | 0 | 0        | 1        | 0        | 0        | 0        | 0 | 0        | 0       | 0 | 0        | 0                                                          | 0 | 0        | 0 |   |          |   |   |          |   |   |   |                                                |  |  |  |  |  |  |  |  |  |  |  |
|                                                 | Oral disorder                                   | 1                                                        | 0 | 0        | 0        | 0        | 0        | 1        | 0 | 0        | 0       | 0 | 0        | 0                                                          | 0 | 0        | 0 |   |          |   |   |          |   |   |   |                                                |  |  |  |  |  |  |  |  |  |  |  |
|                                                 | Activated partial thromboplastin time prolonged | 0                                                        | 0 | 0        | 1        | 0        | 0        | 0        | 0 | 0        | 0       | 0 | 0        | 0                                                          | 0 | 0        | 0 |   |          |   |   |          |   |   |   |                                                |  |  |  |  |  |  |  |  |  |  |  |
|                                                 | Alanine aminotransferase increased              | 2                                                        | 0 | 0        | 0        | 0        | 0        | 0        | 1 | 0        | 2       | 0 | 0        | 0                                                          | 0 | 0        | 0 |   |          |   |   |          |   |   |   |                                                |  |  |  |  |  |  |  |  |  |  |  |
| Aspartate aminotransferase increased            | 0                                               | 0                                                        | 0 | 0        | 0        | 0        | 1        | 0        | 0 | 1        | 0       | 0 | 0        | 0                                                          | 0 | 0        |   |   |          |   |   |          |   |   |   |                                                |  |  |  |  |  |  |  |  |  |  |  |
| Decreased appetite                              | 1                                               | 0                                                        | 0 | 0        | 0        | 0        | 0        | 0        | 0 | 0        | 0       | 0 | 0        | 0                                                          | 0 | 0        |   |   |          |   |   |          |   |   |   |                                                |  |  |  |  |  |  |  |  |  |  |  |
| Eosinophilia                                    | 0                                               | 0                                                        | 0 | 1        | 0        | 0        | 0        | 0        | 0 | 0        | 0       | 0 | 0        | 0                                                          | 0 | 0        |   |   |          |   |   |          |   |   |   |                                                |  |  |  |  |  |  |  |  |  |  |  |
| Haematuria                                      | 0                                               | 0                                                        | 0 | 0        | 0        | 0        | 1        | 0        | 0 | 0        | 0       | 0 | 0        | 0                                                          | 0 | 0        |   |   |          |   |   |          |   |   |   |                                                |  |  |  |  |  |  |  |  |  |  |  |
| Haemoglobin decreased                           | 1                                               | 0                                                        | 0 | 0        | 0        | 0        | 1        | 0        | 0 | 0        | 1       | 0 | 0        | 0                                                          | 0 | 0        |   |   |          |   |   |          |   |   |   |                                                |  |  |  |  |  |  |  |  |  |  |  |
| Lymphadenopathy                                 | 0                                               | 0                                                        | 0 | 2        | 0        | 0        | 0        | 0        | 0 | 1        | 0       | 0 | 0        | 0                                                          | 0 | 0        |   |   |          |   |   |          |   |   |   |                                                |  |  |  |  |  |  |  |  |  |  |  |
| Lymphocyte count decreased                      | 0                                               | 0                                                        | 0 | 2        | 3        | 3        | 3        | 3        | 0 | 1        | 0       | 0 | 0        | 0                                                          | 0 | 0        |   |   |          |   |   |          |   |   |   |                                                |  |  |  |  |  |  |  |  |  |  |  |
| Lymphopenia                                     | 1                                               | 2                                                        | 4 | 0        | 0        | 0        | 0        | 2        | 0 | 0        | 0       | 0 | 0        | 0                                                          | 0 | 0        |   |   |          |   |   |          |   |   |   |                                                |  |  |  |  |  |  |  |  |  |  |  |
| Neutropenia                                     | 3                                               | 0                                                        | 0 | 0        | 0        | 0        | 0        | 0        | 0 | 0        | 0       | 0 | 0        | 0                                                          | 0 | 0        |   |   |          |   |   |          |   |   |   |                                                |  |  |  |  |  |  |  |  |  |  |  |
| Neutrophil count decreased                      | 0                                               | 1                                                        | 0 | 4        | 0        | 0        | 0        | 4        | 0 | 0        | 0       | 0 | 0        | 0                                                          | 0 | 0        |   |   |          |   |   |          |   |   |   |                                                |  |  |  |  |  |  |  |  |  |  |  |
| Platelet count decreased                        | 1                                               | 0                                                        | 0 | 0        | 1        | 0        | 0        | 0        | 0 | 0        | 0       | 0 | 0        | 0                                                          | 0 | 0        |   |   |          |   |   |          |   |   |   |                                                |  |  |  |  |  |  |  |  |  |  |  |
| Prothrombin time prolonged                      | 0                                               | 1                                                        | 0 | 0        | 0        | 0        | 0        | 0        | 0 | 0        | 0       | 0 | 0        | 0                                                          | 0 | 0        |   |   |          |   |   |          |   |   |   |                                                |  |  |  |  |  |  |  |  |  |  |  |
| White blood cell count decreased                | 4                                               | 0                                                        | 0 | 3        | 0        | 0        | 2        | 0        | 0 | 1        | 0       | 0 | 0        | 0                                                          | 0 | 0        |   |   |          |   |   |          |   |   |   |                                                |  |  |  |  |  |  |  |  |  |  |  |
| Only subjects enrolled at WRAIR                 |                                                 | Adverse Events After First Vaccination (Study days 0-28) |   |          |          |          |          |          |   |          |         |   |          | All Adverse Events in Study (Study days 0-180)             |   |          |   |   |          |   |   |          |   |   |   |                                                |  |  |  |  |  |  |  |  |  |  |  |
| AE Term                                         | Cohort 1                                        |                                                          |   | Cohort 2 |          |          | Cohort 3 |          |   | Placebo  |         |   | Cohort 1 |                                                            |   | Cohort 2 |   |   | Cohort 3 |   |   | Placebo  |   |   |   |                                                |  |  |  |  |  |  |  |  |  |  |  |
|                                                 | Severity                                        |                                                          |   | Severity |          |          | Severity |          |   | Severity |         |   | Severity |                                                            |   | Severity |   |   | Severity |   |   | Severity |   |   |   |                                                |  |  |  |  |  |  |  |  |  |  |  |
|                                                 | 1                                               | 2                                                        | 3 | 1        | 2        | 3        | 1        | 2        | 3 | 1        | 2       | 3 | 1        | 2                                                          | 3 | 1        | 2 | 3 | 1        | 2 | 3 | 1        | 2 | 3 |   |                                                |  |  |  |  |  |  |  |  |  |  |  |
| Solicited AE                                    | Abdominal pain                                  | 2                                                        | 0 | 0        | 1        | 1        | 0        | 0        | 1 | 0        | 1       | 0 | 0        | 1                                                          | 0 | 0        | 1 | 0 | 0        | 1 | 0 | 0        | 0 | 0 |   |                                                |  |  |  |  |  |  |  |  |  |  |  |
|                                                 | Arthralgia                                      | 1                                                        | 0 | 0        | 1        | 0        | 2        | 2        | 1 | 0        | 0       | 0 | 0        | 1                                                          | 0 | 0        | 2 | 2 | 1        | 0 | 0 | 0        | 0 | 0 |   |                                                |  |  |  |  |  |  |  |  |  |  |  |
|                                                 | Chills                                          | 1                                                        | 1 | 1        | 2        | 0        | 2        | 1        | 4 | 2        | 0       | 0 | 0        | 1                                                          | 1 | 2        | 0 | 2 | 1        | 4 | 2 | 0        | 0 | 0 |   |                                                |  |  |  |  |  |  |  |  |  |  |  |
|                                                 | Diarrhea                                        | 0                                                        | 0 | 0        | 0        | 0        | 0        | 1        | 0 | 0        | 1       | 0 | 0        | 0                                                          | 0 | 0        | 0 | 1 | 0        | 0 | 1 | 0        | 0 | 0 |   |                                                |  |  |  |  |  |  |  |  |  |  |  |
|                                                 | Fatigue                                         | 4                                                        | 2 | 0        | 2        | 1        | 4        | 1        | 2 | 1        | 0       | 0 | 0        | 4                                                          | 2 | 0        | 2 | 1 | 4        | 1 | 2 | 1        | 0 | 0 |   |                                                |  |  |  |  |  |  |  |  |  |  |  |
|                                                 | Headache                                        | 1                                                        | 3 | 1        | 2        | 2        | 1        | 4        | 2 | 1        | 2       | 0 | 0        | 1                                                          | 3 | 1        | 2 | 2 | 1        | 4 | 2 | 1        | 2 | 0 |   |                                                |  |  |  |  |  |  |  |  |  |  |  |
|                                                 | Injection-Site Pain                             | 6                                                        | 2 | 0        | 7        | 1        | 0        | 9        | 1 | 0        | 4       | 0 | 0        | 6                                                          | 2 | 0        | 7 | 1 | 0        | 9 | 1 | 0        | 4 | 0 |   |                                                |  |  |  |  |  |  |  |  |  |  |  |
|                                                 | Injection-Site Redness                          | 1                                                        | 0 | 0        | 0        | 0        | 0        | 0        | 0 | 0        | 0       | 0 | 0        | 1                                                          | 0 | 0        | 0 | 0 | 0        | 0 | 0 | 0        | 0 | 0 |   |                                                |  |  |  |  |  |  |  |  |  |  |  |
|                                                 | Injection-Site Swelling                         | 4                                                        | 2 | 0        | 1        | 2        | 1        | 4        | 1 | 1        | 0       | 0 | 0        | 4                                                          | 2 | 0        | 1 | 2 | 1        | 4 | 1 | 1        | 0 | 0 |   |                                                |  |  |  |  |  |  |  |  |  |  |  |
|                                                 | Myalgia                                         | 0                                                        | 1 | 0        | 1        | 1        | 0        | 1        | 1 | 0        | 1       | 0 | 0        | 0                                                          | 1 | 0        | 1 | 1 | 0        | 1 | 1 | 0        | 1 | 0 |   |                                                |  |  |  |  |  |  |  |  |  |  |  |
|                                                 | Nausea                                          | 2                                                        | 1 | 0        | 2        | 1        | 0        | 2        | 2 | 1        | 0       | 0 | 0        | 2                                                          | 1 | 0        | 2 | 2 | 1        | 0 | 2 | 1        | 0 | 0 |   |                                                |  |  |  |  |  |  |  |  |  |  |  |
|                                                 | Objective Fever                                 | 1                                                        | 1 | 2        | 1        | 1        | 1        | 2        | 1 | 0        | 0       | 0 | 0        | 1                                                          | 1 | 0        | 0 | 0 | 0        | 2 | 0 | 0        | 0 | 0 |   |                                                |  |  |  |  |  |  |  |  |  |  |  |
|                                                 | Subjective Fever                                | 0                                                        | 0 | 0        | 1        | 0        | 0        | 1        | 2 | 1        | 0       | 0 | 0        | 0                                                          | 0 | 0        | 1 | 1 | 1        | 3 | 2 | 1        | 0 | 0 |   |                                                |  |  |  |  |  |  |  |  |  |  |  |
|                                                 | Sweats                                          | 0                                                        | 0 | 0        | 1        | 0        | 0        | 1        | 2 | 1        | 0       | 0 | 0        | 0                                                          | 0 | 0        | 1 | 0 | 0        | 2 | 1 | 0        | 0 | 0 |   |                                                |  |  |  |  |  |  |  |  |  |  |  |
|                                                 | Unsolicited AE                                  | Anaemia                                                  | 0 | 0        | 0        | 0        | 0        | 0        | 0 | 1        | 0       | 0 | 0        | 0                                                          | 0 | 0        | 0 | 0 | 0        | 0 | 1 | 0        | 0 | 0 | 0 |                                                |  |  |  |  |  |  |  |  |  |  |  |
| Dizziness postural                              |                                                 | 0                                                        | 0 | 0        | 0        | 0        | 0        | 0        | 0 | 0        | 0       | 0 | 0        | 0                                                          | 0 | 0        | 0 | 0 | 0        | 1 | 0 | 0        | 0 | 0 |   |                                                |  |  |  |  |  |  |  |  |  |  |  |
| Injection site bruising                         |                                                 | 1                                                        | 0 | 0        | 0        | 0        | 0        | 0        | 0 | 0        | 0       | 0 | 0        | 1                                                          | 0 | 0        | 0 | 0 | 0        | 0 | 0 | 0        | 1 | 0 |   |                                                |  |  |  |  |  |  |  |  |  |  |  |
| Activated partial thromboplastin time prolonged |                                                 | 0                                                        | 0 | 0        | 0        | 0        | 0        | 0        | 0 | 0        | 0       | 0 | 0        | 0                                                          | 0 | 0        | 0 | 0 | 0        | 0 | 0 | 0        | 0 | 2 | 0 |                                                |  |  |  |  |  |  |  |  |  |  |  |
| Alanine aminotransferase increased              |                                                 | 0                                                        | 0 | 0        | 0        | 0        | 0        | 0        | 0 | 0        | 0       | 0 | 0        | 0                                                          | 0 | 0        | 0 | 0 | 0        | 0 | 0 | 0        | 0 | 1 | 0 |                                                |  |  |  |  |  |  |  |  |  |  |  |
| Aspartate aminotransferase increased            |                                                 | 0                                                        | 0 | 0        | 0        | 0        | 0        | 0        | 0 | 0        | 0       | 0 | 0        | 0                                                          | 0 | 0        | 0 | 0 | 0        | 0 | 0 | 0        | 0 | 1 | 0 |                                                |  |  |  |  |  |  |  |  |  |  |  |
| Haemoglobin decreased                           |                                                 | 0                                                        | 0 | 0        | 1        | 3        | 3        | 2        | 3 | 0        | 0       | 0 | 0        | 0                                                          | 0 | 0        | 0 | 0 | 0        | 1 | 3 | 3        | 0 | 0 | 0 |                                                |  |  |  |  |  |  |  |  |  |  |  |
| Lymphocyte count decreased                      |                                                 | 1                                                        | 2 | 4        | 0        | 0        | 0        | 0        | 2 | 0        | 0       | 0 | 0        | 1                                                          | 2 | 4        | 0 | 0 | 0        | 0 | 2 | 0        | 0 | 0 | 0 |                                                |  |  |  |  |  |  |  |  |  |  |  |
| Lymphopenia                                     |                                                 | 3                                                        | 0 | 0        | 0        | 0        | 0        | 0        | 0 | 0        | 0       | 0 | 0        | 3                                                          | 0 | 0        | 0 | 0 | 0        | 0 | 0 | 0        | 0 | 0 | 0 |                                                |  |  |  |  |  |  |  |  |  |  |  |
| Neutropenia                                     |                                                 | 0                                                        | 1 | 0        | 2        | 0        | 0        | 0        | 3 | 0        | 0       | 0 | 0        | 0                                                          | 1 | 0        | 2 | 0 | 0        | 0 | 3 | 0        | 0 | 0 | 0 |                                                |  |  |  |  |  |  |  |  |  |  |  |
| Neutrophil count decreased                      | 1                                               | 0                                                        | 0 | 0        | 1        | 0        | 0        | 0        | 0 | 0        | 0       | 0 | 1        | 0                                                          | 0 | 0        | 0 | 0 | 0        | 0 | 0 | 0        | 0 | 0 |   |                                                |  |  |  |  |  |  |  |  |  |  |  |
| Platelet count decreased                        | 0                                               | 0                                                        | 0 | 0        | 0        | 0        | 0        | 0        | 0 | 0        | 0       | 0 | 0        | 0                                                          | 0 | 0        | 0 | 0 | 0        | 0 | 0 | 0        | 0 | 0 |   |                                                |  |  |  |  |  |  |  |  |  |  |  |
| Prothrombin time prolonged                      | 0                                               | 0                                                        | 0 | 0        | 0        | 0        | 0        | 0        | 0 | 0        | 0       | 0 | 0        | 0                                                          | 0 | 0        | 0 | 0 | 0        | 0 | 0 | 0        | 0 | 0 |   |                                                |  |  |  |  |  |  |  |  |  |  |  |
| White blood cell count decreased                | 2                                               | 0                                                        | 0 | 2        | 0        | 0        | 3        | 0        | 0 | 1        | 0       | 0 | 2        | 0                                                          | 0 | 2        | 0 | 0 | 3        | 0 | 0 | 1        | 0 | 0 |   |                                                |  |  |  |  |  |  |  |  |  |  |  |
| Only subjects enrolled at NIH                   |                                                 | Adverse Events After First Vaccination (Study days 0-28) |   |          |          |          |          |          |   |          |         |   |          | Adverse Events After Second Vaccination (Study days 29-56) |   |          |   |   |          |   |   |          |   |   |   | All Adverse Events in Study (Study days 0-180) |  |  |  |  |  |  |  |  |  |  |  |
| AE Term                                         | Cohort 1                                        |                                                          |   | Cohort 2 |          |          | Cohort 3 |          |   | Placebo  |         |   | Cohort 1 |                                                            |   | Cohort 2 |   |   | Cohort 3 |   |   | Placebo  |   |   |   |                                                |  |  |  |  |  |  |  |  |  |  |  |
|                                                 | Severity                                        |                                                          |   | Severity |          |          | Severity |          |   | Severity |         |   | Severity |                                                            |   | Severity |   |   | Severity |   |   | Severity |   |   |   |                                                |  |  |  |  |  |  |  |  |  |  |  |
|                                                 | 1                                               | 2                                                        | 3 | 1        | 2        | 3        | 1        | 2        | 3 | 1        | 2       | 3 | 1        | 2                                                          | 3 | 1        | 2 | 3 | 1        | 2 | 3 | 1        | 2 | 3 |   |                                                |  |  |  |  |  |  |  |  |  |  |  |
| Solicited AE                                    | Abdominal pain                                  | 0                                                        | 0 | 0        | 0        | 0        | 0        | 0        | 0 | 0        | 0       | 0 | 0        | 0                                                          | 0 | 0        | 0 | 0 | 0        | 0 | 0 | 0        | 0 | 0 |   |                                                |  |  |  |  |  |  |  |  |  |  |  |
|                                                 | Arthralgia                                      | 2                                                        | 2 | 0        | 2        | 2        | 0        | 1        | 2 | 0        | 0       | 0 | 0        | 0                                                          | 0 | 0        | 0 | 0 | 0        | 0 | 0 | 0        | 0 | 0 |   |                                                |  |  |  |  |  |  |  |  |  |  |  |
|                                                 | Chills                                          | 2                                                        | 2 | 0        | 4        | 3        | 0        | 4        | 1 | 0        | 0       | 0 | 0        | 0                                                          | 0 | 0        | 0 | 0 | 0        | 0 | 0 | 0        | 0 | 0 |   |                                                |  |  |  |  |  |  |  |  |  |  |  |
|                                                 | Diarrhea                                        | 0                                                        | 0 | 0        | 1        | 0        | 0        | 1        | 0 | 0        | 0       | 0 | 0        | 0                                                          | 0 | 0        | 0 | 0 | 0        | 0 | 0 | 0        | 0 | 0 |   |                                                |  |  |  |  |  |  |  |  |  |  |  |
|                                                 | Fatigue                                         | 6                                                        | 0 | 1        | 4        | 5        | 0        | 3        | 3 | 1        | 1       | 0 | 0        | 0                                                          | 0 | 0        | 0 | 0 | 0        | 0 | 0 | 0        | 0 | 0 |   |                                                |  |  |  |  |  |  |  |  |  |  |  |
|                                                 | Headache                                        | 6                                                        | 1 | 0        | 5        | 1        |          |          |   |          |         |   |          |                                                            |   |          |   |   |          |   |   |          |   |   |   |                                                |  |  |  |  |  |  |  |  |  |  |  |
